# Supplementary material
Source: publisher figshare collection journal article supplement (https://karger.figshare.com/ndownloader/files/8879860)
Supplement: Supplementary file 1 [file 8879860]

## Sheet: Blatt1
supplemental Table 2. Overview of NIRS values for the entire study population as well
as the normal (MRInorm) and pathological MRI (MRIpath) group. Data is subdivided into
a cooling period (separated into day (d) 1, d2 and d3 of cooling) and a postcooling period.
NIRS PARAMETER
			study population					MRTnorm					MRTpath
			Mean ± SD					Mean ± SD					Mean ± SD
small adult sensor	rScO2	cooling	76.33	±	7.98			75.75	±	8.2			77.77	±	7.69
		d1 cooling	73.1	±	10.8			72.84	±	11.06			73.7	±	10.82
		d2 cooling	77.8	±	8.76			76.86	±	9.35			80.11	±	7.04
		d3 cooling	77.75	±	7.96			76.98	±	8.29			79.43	±	7.3
		post cooling	77.54	±	7.96			76.09	±	8.33			80.91	±	6.17
		entire duration	75.98	±	7.63			75.38	±	7.86			77.47	±	7.26
	cFTOE	cooling	0.2	±	0.09			0.21	±	0.09			0.18	±	0.08
		d1 cooling	0.23	±	0.11			0.24	±	0.12			0.22	±	0.11
		d2 cooling	0.19	±	0.1			0.2	±	0.11			0.16	±	0.08
		d3 cooling	0.18	±	0.09			0.19	±	0.09			0.17	±	0.09
		post cooling	0.18	±	0.09			0.19	±	0.1			0.14	±	0.08
		entire duration	0.2	±	0.09			0.21	±	0.09			0.18	±	0.08
neonatal sensor	rScO2	cooling	83.8455	±	6.77			83.3536	±	6.96			85.06	±	6.51
		d1 cooling	81.1	±	9.16			80.88	±	9.37			81.62	±	9.18
		d2 cooling	85.1	±	7.43			84.3	±	7.93			87.06	±	5.97
		d3 cooling	85.04	±	6.75			84.39	±	7.03			86.49	±	6.2
		post cooling	84.88	±	6.75			83.65	±	7.06			87.74	±	5.25
		entire duration	83.5486	±	6.46			83.0398	±	6.66			84.79	±	6.14
	cFTOE	cooling	0.12	±	0.08			0.13	±	0.08			0.11	±	0.07
		d1 cooling	0.15	±	0.1			0.16	±	0.1			0.14	±	0.09
		d2 cooling	0.11	±	0.09			0.12	±	0.09			0.09	±	0.07
		d3 cooling	0.11	±	0.07			0.11	±	0.07			0.09	±	0.07
		post cooling	0.1	±	0.08			0.11	±	0.08			0.06	±	0.07
		entire duration	0.12	±	0.07			0.13	±	0.08			0.11	±	0.07
